# Supplementary material for: Waste Biomass-Mediated Synthesis of TiO2/P, K-Containing Grapefruit Peel Biochar Composites with Enhanced Photocatalytic Activity
Source: MDPI journal article supplement (doi:10.3390/molecules29092090), 2024-05-01
Supplement: s1 [file s1]

## Supplementary Materials

### **Waste biomass-mediated synthesis of TiO<sub>2</sub>/P, K-containing grapefruit peel biochar Composites with enhanced photocatalytic activity**

Ruixiang Wu<sup>1, 2</sup>, Wenhua Liu<sup>1,\*</sup>, Renao Bai<sup>2</sup>, Delun Zheng<sup>2</sup>, Xiufang Tian<sup>2</sup>, Weikai Lin<sup>2</sup>, Qianwei Ke<sup>2</sup>, Lejian Li<sup>2</sup>

<sup>1</sup> Guangdong Provincial Laboratory of Marine Biotechnology, Institute of Marine Sciences, Shantou University, Shantou 515063, Guangdong, PR China; rxwu1@stu.edu.cn; whliu@stu.edu.cn.

<sup>2</sup> College of Construction and Ecology, Shantou Polytechnic, Shantou, Guangdong 515078, PR China; rxwu@stpt.edu.cn; bairenao@163.com; xftian@stpt.edu.cn; linweikai@163.com; qianweike1999@163.com; lilejian2024@163.com.

\* Correspondence: whliu@stu.edu.cn

\*Corresponding authors: Wenhua Liu<sup>1,\*</sup>

mail address: [whliu@stu.edu.cn](mailto:whliu@stu.edu.cn)

## Contents

### Section S1. Instrument and equipment

**Scheme S1.** Diagram of the preparation procedure of the TiO<sub>2</sub>/PC composites

### Section S1. Instrument and equipment

Thermal gravimetric analyzer(TG209F3,NETZSCH Scientific Instruments Trading Ltd); The waring blender (JJ-2; Changzhou Jintan Jingda Instrument Manufacturing Co., Ltd) was utilized in this research. Electronic balance (LC-JA11003), freeze drier (LC-10N), magnetic stirrer hotplate (LC-MSA-H), desk centrifuge (TGL-LX185C) were acquired from Shanghai LiChen Instrument Technology Co., Vacuum tube furnace(GSL-1700X), provided by Hefei Kejing Materials Technology Co., Ltd, Ltd. Rotary evaporator (RE-52; Yarong Biochemical Instrument Co., Ltd); UV-Vis spectrophotometer (UV-2500 model; Shimadzu, Japan); UV diffuse reflectance spectrophotometer (UV-3600i Plus; Shimadzu, Japan); X-ray diffractometer (Ultima VI model; Rigaku Corporation, Japan); Field emission scanning electron microscope (SEM; Gemini SEM450; Carl Zeiss AG, Germany); Field emission transmission electron microscope (TEM; JEM-F200; JEOL, Japan); X-ray photoelectron spectrometer (Thermo Scientific K-Alpha; Thermo Fisher Scientific); Brunauer-Emmett-Teller (BET) surface area analyzer (ASAP 2460; Micromeritics, USA); and mercury lamp (CME-M300, China Microenergy (Beijing) Technology Co., Ltd); Fourier-transform infrared spectroscopy (FTIR, Nicolet iS50, USA); TOC analysis instrument(TOC-L, Shimadzu, Japan); Electron paramagnetic resonance(Bruker EMXnano, Bruker Corporation), Electrochemical workstation (CH1604E) provided by Shanghai Chenhua Instrument Co., Ltd., Raman spectrometer (renishaw inVa) by Renishaw plc, United Kingdom.

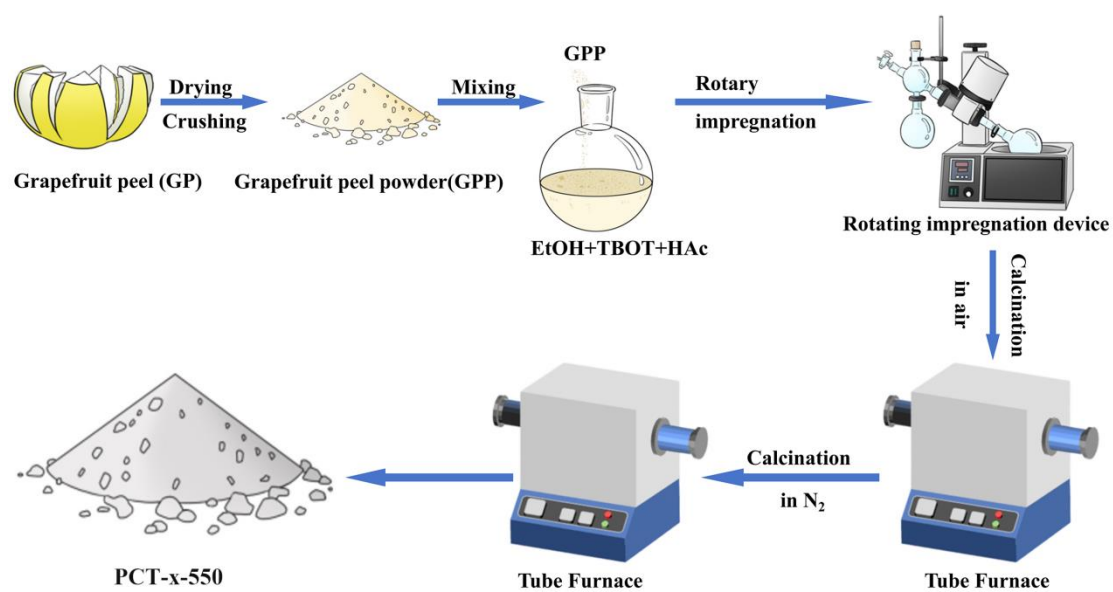

**Scheme S1.** Diagram of the preparation procedure of the  $\text{TiO}_2/\text{PC}$  composites
